# Supplementary material
Source: PubMed Central journal article supplement (PMC4178755)
Supplement: JVI.01621-14_zjv999099502so1.pdf [file JVI.01621-14_zjv999099502so1.pdf]

## Legends to Supplementary Material

**Fig. S1.** Group mean titer ( $\pm$ SEM) of rabbit HIV-1 CN54gp140 and HSP70 specific IgG and IgA concentrations after intravaginal immunizations with the HIV-HSP70 vaccine (n=4) or saline control (n=4) before and 16 weeks after immunization (Im.). No significant differences were found between baselines and 16 weeks post-immunization or saline and vaccine injection.

**Fig. S2.** Correlation between (A) MIP-1 $\beta$  (pg/ml) and APOBEC3G (%), between CCR5 in CD4<sup>+</sup> T cells (%) and proliferation (%) of (B) unstimulated, (C) HIVgp140 stimulated and (D) HSP70 PBMC cultures.

**Table S1.** (A) Consort Checklist of subjects enrolled. (B) Severity of adverse events and relationship to vaccine.

**Table S2.** Sequential plasma RANTES (CCL-5) concentration (ng/ml) of each vaccinated female at 0, 4 and 12 weeks, sampled at 0 (pre-), 4, 8, 16 and 20 weeks after immunization. The mean ( $\pm$ sem) is presented and the p value was calculated using the Wilcoxon rank sum test. (n=8).

**Table S3.** Sequential concentrations in pg/ml of (A) MIP-1 $\alpha$  (CCL-3), (B) MIP-1 $\beta$  (CCL-4) of the culture supernatant from CD4<sup>+</sup> T cells in unstimulated (Medium), HIVgp140 and HSP70 stimulated cells from each vaccinated female at 0, 4 and 12 weeks, sampled at 0 (pre-), 4, 8, 16 and 20 weeks. The mean ( $\pm$ sem) are presented and the p value was calculated using the Wilcoxon rank sum test: (n=7 as one culture supernatant was lost).

**Table S4.** Sequential percentage of CCR5 expression in CD4<sup>+</sup> T cells of each vaccinated female at 0, 4 and 12 weeks, sampled at 0 (pre-), 4, 8 and 20 weeks. The mean ( $\pm$ sem) are presented and the p value was calculated using the Wilcoxon rank sum test (n=7).

**Table S5.** Sequential percentage of APOBEC3G of each vaccinated female at 0, 4 and 12 weeks, sampled at 0 (pre-), 4, 8, 16 and 20 weeks. The mean ( $\pm$ sem) are presented and the p value was calculated using the Wilcoxon rank sum test. (n=8).

**Table S6.** Sequential percentage of (A) PBMC, (B) CD4<sup>+</sup> T cells and (C) CD8<sup>+</sup> T cell proliferation of unstimulated, HIVgp140 and HSP70 stimulated cell cultures in each vaccinated female at 0, 4 and 12 weeks, sampled at 0 (pre-), 4, 8, 16 and 20 weeks. The mean ( $\pm$ sem) are presented and the p value was calculated using the Wilcoxon rank sum test. (n=8).

**Table S7.** The cytokines IL-12 and IL-6 were assayed by intracellular staining with the corresponding monoclonal antibodies of CD4<sup>+</sup> T cells before (0) and 20 weeks (8 weeks after the 3<sup>rd</sup> immunization). The data are presented in each of the immunized females (n=6, available cells) as % and as the net change; pre-immunization % subtracted from the post-immunization %. The corresponding viral loads (VL) are given pre- and post-immunization as area under the curve (AUC) and the net change as above.

Fig. S1

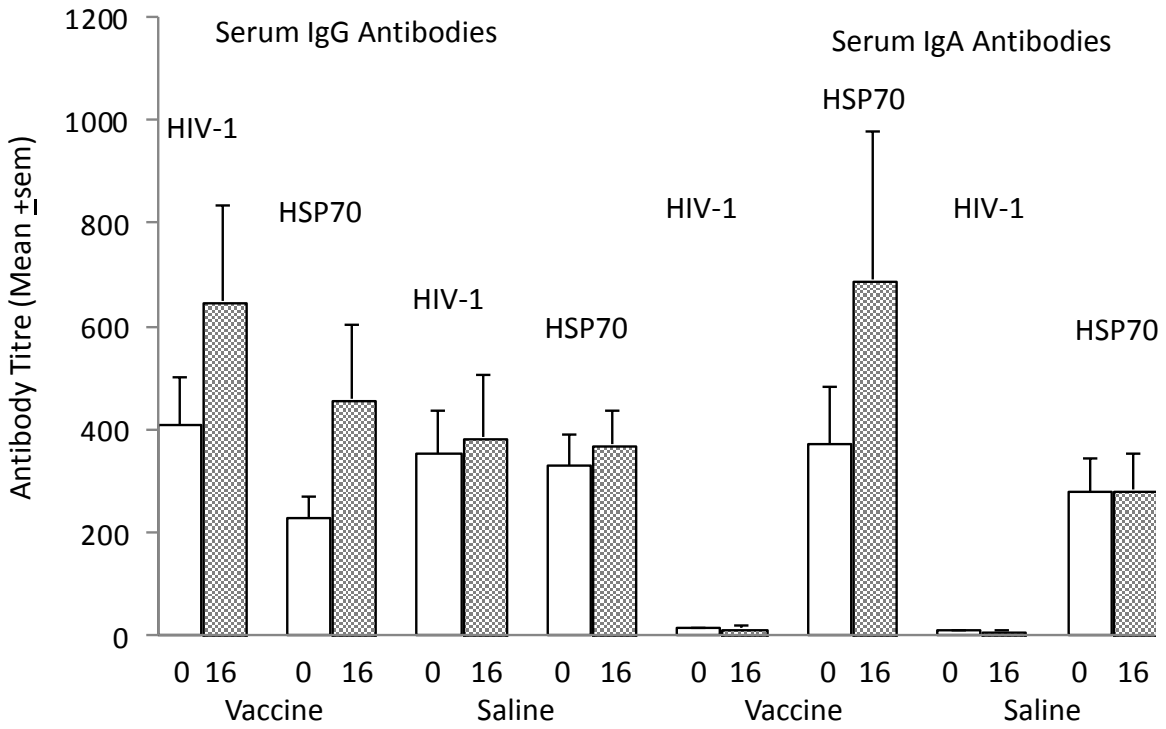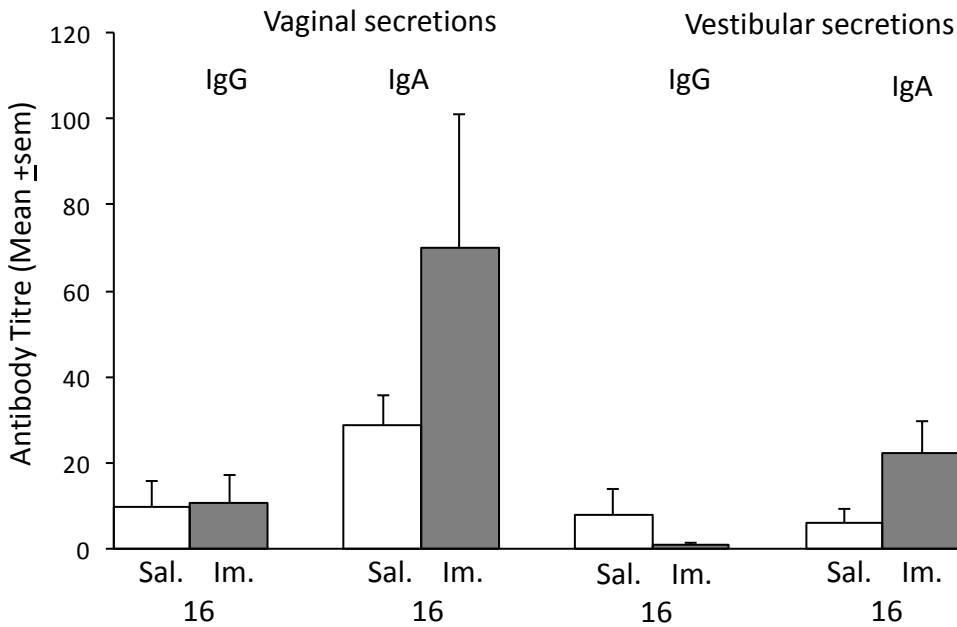

Fig. S2

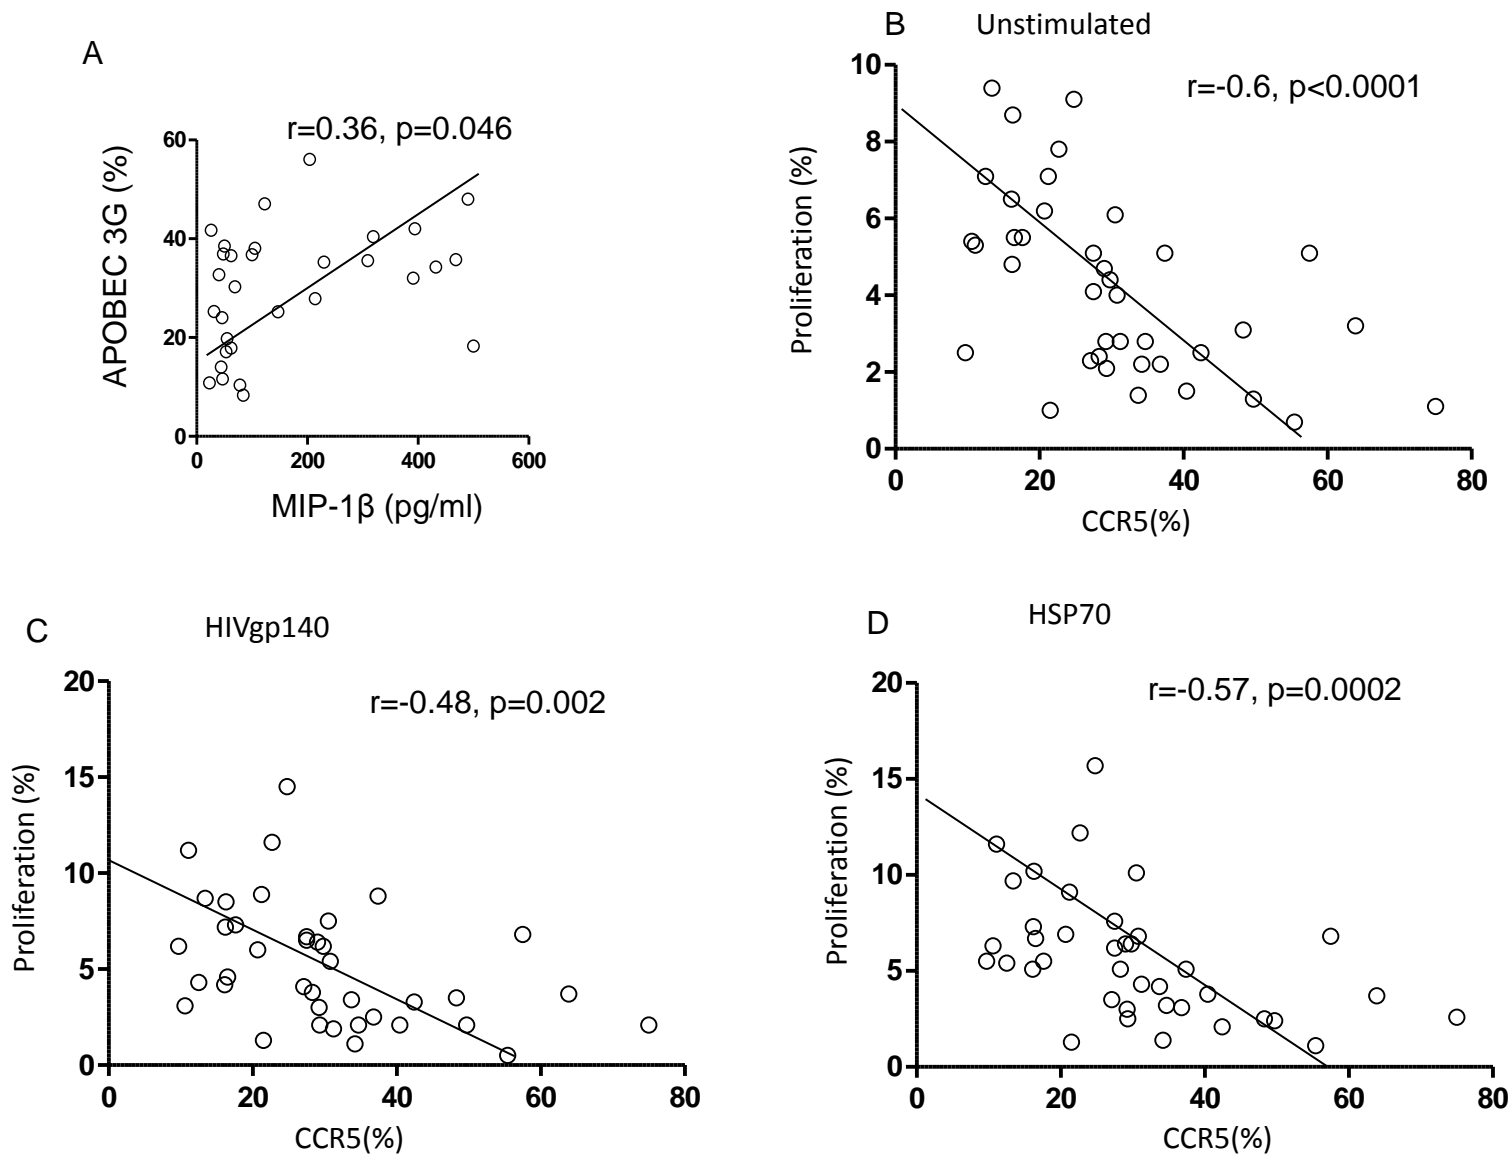

**Table S1A Consort Checklist of subjects enrolled**

|                   |                                                                                                                                                                             |
|-------------------|-----------------------------------------------------------------------------------------------------------------------------------------------------------------------------|
| <b>Enrolment</b>  | Assessed for eligibility (n=14)                                                                                                                                             |
| <b>Allocation</b> | Allocated to intervention (n=9)<br>◇ Received allocated intervention (n=8)<br>◇ Did not received allocated intervention (n=1)<br>(No longer meeting inclusion criteria n=1) |
| <b>Follow-Up</b>  | ◇ Lost to follow-up (n=0)<br>◇ Discontinued intervention (n=1)<br>(Unrelated SAE<br>n=1)                                                                                    |
| <b>Analysis</b>   | Analysed (n=8)<br>◇ Excluded from analysis (n=0)                                                                                                                            |
|                   | *Excluded (n=5)<br>◇ Not meeting inclusion criteria (n=2)<br>◇ Withdrew consent (n=3)                                                                                       |

**Table S1B Severity of adverse Events and relationship to vaccine**

| <b>Organ System</b>            | <b>Severity</b> |                 |               | <b>Relationship to vaccine</b> |                 |
|--------------------------------|-----------------|-----------------|---------------|--------------------------------|-----------------|
|                                | <b>Mild</b>     | <b>Moderate</b> | <b>Severe</b> | <b>Unrelated</b>               | <b>Possible</b> |
| Bone and Joints                |                 |                 | 1             | 1                              |                 |
| Dental                         |                 | 1               | 1             | 2                              |                 |
| Gastrointestinal               |                 | 1               |               | 1                              |                 |
| Hepatobiliary                  | 3               |                 |               | 3                              |                 |
| Immune System                  |                 | 1               |               | 1                              |                 |
| Headache                       | 6               | 5               |               | 11                             |                 |
| Renal                          |                 |                 | 1             | 1                              |                 |
| Vulvitis                       | 10              | 4               | 1             | 12                             | 3               |
| Respiratory                    | 5               | 1               |               | 6                              |                 |
| Skin and Soft Tissue           | 3               | 1               |               | 4                              |                 |
| <b>Relationship to vaccine</b> |                 |                 |               |                                |                 |
| Unrelated                      | 27              | 11              | 4             |                                |                 |
| Possible                       |                 | 3               |               |                                |                 |
| <b>Total number of AEs</b>     | <b>27</b>       | <b>14</b>       | <b>4</b>      | <b>42</b>                      | <b>3</b>        |

**Table S2****Plasma CCL-5 (RANTES) ng/ml**

|      | Pre-<br><b>0</b> | Post-Immunization (weeks) |       |        |       |
|------|------------------|---------------------------|-------|--------|-------|
|      |                  | 4                         | 8     | 16     | 20    |
| 301  | 51.1             | 71.1                      | 76.9  | 73.8   | 107.1 |
| 302  | 141              | 159                       | 223   | 170    | 261   |
| 303  | 191              | 180                       | 184   | 291    | 231   |
| 304  | 124              | 217                       | 275   | 180    | 139   |
| 305  | 40               | 35                        | 102   | 210    | 51    |
| 308  | 88               | 65                        | 57    |        | 66    |
| 310  | 100              | 170                       | 175   | 124    | 239   |
| 313  | 55               | 48                        | 171   | 94     | 211   |
| mean | 98.8             | 118.1                     | 158   | 161.1  | 163.1 |
| sem  | 18.2             | 24.9                      | 26.4  | 24.1   | 29.3  |
| p'   |                  | 0.46                      | 0.055 | 0.0156 | 0.039 |

**Table S3 (A) Culture supernatant MIP-1 $\alpha$** 

|               | Post-Immunization (weeks) |       |       |        |
|---------------|---------------------------|-------|-------|--------|
|               | Pre-0                     | 4     | 8     | 16     |
| <b>Medium</b> |                           |       |       |        |
| 302           | 2.6                       | 19.7  | 43.4  | 356    |
| 303           | 103.4                     | 107   | 80.1  | 327    |
| 304           | 2.2                       | 84.8  | 265   | 234    |
| 305           | 2.2                       | 12.4  | 149.3 | 231.5  |
| 308           | 34.6                      | 147   | 161   | 246    |
| 310           | 1.5                       | 7.3   | 123   | 231    |
| 313           | 101                       | 56    | 121   | 124    |
| mean          | 35.36                     | 62.03 | 134.7 | 249.9  |
| sem           | 17.83                     | 20.15 | 26.51 | 28.46  |
| p'            |                           | 0.156 | 0.047 | 0.0156 |

**HIVgp140**

|      |       |       |       |        |
|------|-------|-------|-------|--------|
| 302  | 32.4  | 37.5  | 38.3  | 873.7  |
| 303  | 207.5 | 168   |       | 1772.4 |
| 304  | 4     | 81.6  | 287   | 987    |
| 305  | 67    | 10.2  | 343.7 | 495.8  |
| 308  | 85    | 229.4 | 231   | 1234   |
| 310  | 22    | 45    | 786   | 987    |
| 313  | 121   | 109   | 212.6 | 654    |
| mean | 76.99 | 97.24 | 316.4 | 1001   |
| sem  | 26.49 | 29.57 | 102.9 | 157.5  |
| 'p'  |       | 0.69  | 0.03  | 0.0156 |

**HSP70**

|      |       |        |       |        |
|------|-------|--------|-------|--------|
| 302  | 13.8  | 326.2  | 348.7 | 1245   |
| 303  | 489.6 | 465    |       | 1345   |
| 304  | 7.3   | 1000.3 | 435   | 1234   |
| 305  | 2.9   | 83     | 1015  | 805.9  |
| 308  | 58    | 569    | 213   | 2122   |
| 310  | 2.2   | 51.7   | 1125  | 1044   |
| 313  | 112   | 90     | 321   | 432    |
| mean | 97.97 | 369.3  | 576.3 | 1175   |
| sem  | 67.03 | 130    | 159.4 | 197.6  |
| p'   |       | 0.078  | 0.03  | 0.0156 |

**(B) Culture supernatant MIP-1 $\beta$** 

|               | Post-Immunization (weeks) |      |   |        |
|---------------|---------------------------|------|---|--------|
|               | Pre-0                     | 4    | 8 | 16     |
| <b>Medium</b> |                           |      |   |        |
| 25            | 32                        | 23   |   | 1037.3 |
| 139           | 634                       | 95   |   | 3770.9 |
| 65            | 195                       | 264  |   | 2356   |
| 61            | 80                        | 170  |   | 211    |
| 26            | 50                        | 115  |   | 212.3  |
| 80            | 30                        | 67   |   | 324    |
| 142           | 92                        | 718  |   | 1158   |
| 76.86         | 159                       | 226  |   | 1296   |
| 18.12         | 81.98                     | 104  |   | 503.1  |
|               | 0.45                      | 0.22 |   | 0.0156 |

**HIVgp140**

|       |       |       |  |        |
|-------|-------|-------|--|--------|
| 44    | 23    | 26    |  | 1191.4 |
| 161   | 599   | 93    |  | 4874.3 |
| 56    | 260   | 371   |  | 5495.3 |
| 25    | 67    | 367   |  | 432    |
| 50    | 228   | 234   |  | 1077.2 |
| 50    | 34    | 98    |  | 1116   |
| 167   | 638   | 1112  |  | 3245   |
| 79    | 264.1 | 368.2 |  | 2490   |
| 22.26 | 97.98 | 139.3 |  | 772.9  |
|       | 0.078 | 0.11  |  | 0.0156 |

**HSP70**

|       |       |       |  |        |
|-------|-------|-------|--|--------|
| 63    | 245   | 312   |  | 8031.5 |
| 264   | 745   | 56    |  | 7654   |
| 86    | 718   | 469   |  | 7709.9 |
| 12    | 400   | 407   |  | 510.3  |
| 70    | 798   | 323   |  | 5369.3 |
| 50    | 31    | 166   |  | 1923.9 |
| 285   | 432   | 1876  |  | 4321   |
| 118.6 | 481.3 | 592.2 |  | 5074   |
| 41.24 | 108.4 | 260.1 |  | 1131   |
|       | 0.03  | 0.047 |  | 0.0156 |

**Table S4**

|        | <b>CCR5 expression in CD4+ T cells</b> |      |      |      |      |      |      |      |      |     |        |
|--------|----------------------------------------|------|------|------|------|------|------|------|------|-----|--------|
|        | 301                                    | 302  | 304  | 303  | 305  | 308  | 310  | 313  | Mean | sem | p      |
| Pre-   | 55.4                                   | 48.3 | 34.7 | 49.7 | 29.3 | 75   | 63.9 | 40.4 | 49.6 | 5.4 |        |
| 4 wks  | 21.5                                   | 16.5 | 31.2 | 33.7 | 30.5 | 28.3 | 30.8 | 34.2 | 28.3 | 2.2 | 0.015  |
| 8 wks  | 36.8                                   | 9.7  | 10.6 | 27.1 | 11.1 |      | 16.2 | 29.8 | 20.2 | 4.1 | 0.0156 |
| 16 wks | 29.2                                   | 13.4 | 12.5 | 27.5 | 24.8 | 57.5 | 21.2 | 37.4 | 27.9 | 5.1 | 0.0142 |
| 20 wks | 42.4                                   | 16.3 | 16.1 | 20.7 | 29   | 17.6 | 27.5 | 22.7 | 24   | 3.1 | 0.0078 |

**Table S5**

|        | <b>APOBEC3G expression in CD4+ T cells (%)</b> |      |      |      |      |      |      |      |      |     |       |
|--------|------------------------------------------------|------|------|------|------|------|------|------|------|-----|-------|
|        | 301                                            | 302  | 304  | 303  | 305  | 308  | 310  | 313  | Mean | sem | p     |
| Pre-   | 11.6                                           | 10.8 | 17.9 | 27.9 | 36.6 | 53.3 | 32   | 25.3 | 24.7 | 3.6 |       |
| 4 wks  | 10.4                                           | 14   | 36.8 | 40.4 | 38.5 | 35.6 | 42   | 41.7 | 32.4 | 4.5 | 0.195 |
| 8 wks  | 8.3                                            | 24   | 25.2 | 34.3 | 47.1 |      | 18.3 | 36.9 | 27.7 | 4.9 | 0.375 |
| 16 wks | 19.8                                           | 17.1 | 38.1 | 35.8 | 30.3 | 56.1 | 48   | 32.7 | 34.7 | 4.6 | 0.023 |
| 20 wks | 23.1                                           | 15   | 36   | 32.6 | 42.5 | 32.7 | 26   | 36.8 | 30.6 | 3.1 | 0.202 |



**Table S6**

**(A) PBMC Proliferation**

|         | <b>Medium</b>   |      |     |     |      |     |     |      |      |      |       |
|---------|-----------------|------|-----|-----|------|-----|-----|------|------|------|-------|
|         | 301             | 302  | 304 | 303 | 305  | 308 | 310 | 313  | mean | sem  | p     |
| Pre-    | 0.7             | 3.1  | 2.8 | 1.3 | 2.1  | 1.1 | 3.2 | 1.5  | 1.98 | 0.34 |       |
| Post-4  | 1               | 5.5  | 2.8 | 1.4 | 6.1  | 2.4 | 4   | 2.2  | 3.17 | 0.66 | 0.25  |
| Post-8  | 2.2             | 2.5  | 5.4 | 2.3 | 5.3  |     | 4.8 | 4.4  | 3.84 | 0.55 | 0.03  |
| Post-16 | 2.8             | 9.4  | 7.1 | 4.1 | 9.1  | 5.1 | 7.1 | 5.1  | 6.23 | 0.83 | 0.002 |
| Post-20 | 2.5             | 8.7  | 6.5 | 6.2 | 4.7  | 5.5 | 5.1 | 7.8  | 5.88 | 0.68 | 0.001 |
|         | <b>HIVgp140</b> |      |     |     |      |     |     |      |      |      |       |
| Pre-    | 0.5             | 3.5  | 2.1 | 2.1 | 2.1  | 2.1 | 3.7 | 2.1  | 2.28 | 0.35 |       |
| Post-4  | 1.3             | 4.6  | 1.9 | 3.4 | 7.5  | 3.8 | 5.4 | 1.1  | 3.63 | 0.78 | 0.36  |
| Post-8  | 2.5             | 6.2  | 3.1 | 4.1 | 11.2 |     | 7.2 | 6.2  | 5.79 | 1.12 | 0.005 |
| Post-16 | 3               | 8.7  | 4.3 | 6.5 | 14.5 | 6.8 | 8.9 | 8.8  | 7.69 | 1.24 | 0.002 |
| Post-20 | 3.3             | 8.5  | 4.2 | 6   | 6.4  | 7.3 | 6.7 | 11.6 | 6.75 | 0.91 | 0.002 |
|         | <b>HSP70</b>    |      |     |     |      |     |     |      |      |      |       |
| Pre-    | 1.1             | 2.5  | 3.2 | 2.4 | 2.5  | 2.6 | 3.7 | 3.8  | 2.73 | 0.3  |       |
| Post-4  | 1.3             | 6.7  | 4.3 | 4.2 | 10.1 | 5.1 | 6.8 | 1.4  | 4.99 | 1.03 | 0.066 |
| Post-8  | 3.1             | 5.5  | 6.3 | 3.5 | 11.6 |     | 7.3 | 6.4  | 6.24 | 1.07 | 0.009 |
| Post-16 | 3               | 9.7  | 5.4 | 7.6 | 15.7 | 6.8 | 9.1 | 5.1  | 7.8  | 1.38 | 0.003 |
| Post-20 | 2.1             | 10.2 | 5.1 | 6.9 | 6.4  | 5.5 | 6.2 | 12.2 | 6.38 | 1.1  | 0.01  |

**(B) CD4+ T cell Proliferation**

|         | <b>Medium</b>   |     |     |     |      |     |     |     |      |      |       |
|---------|-----------------|-----|-----|-----|------|-----|-----|-----|------|------|-------|
|         | 301             | 302 | 304 | 303 | 305  | 308 | 310 | 313 | mean | sem  | p     |
| Pre-    | 0.5             | 3.4 | 3.2 | 2.3 | 2.4  | 2.6 | 2.9 | 0.4 | 2.21 | 0.41 |       |
| Post-4  | 0.9             | 4.5 | 3   | 4.1 | 3.9  | 4.8 | 3.6 | 1.3 | 3.26 | 0.51 | 0.06  |
| Post-8  | 3.3             | 4.4 | 3.4 | 3.1 | 3.5  |     | 3.6 | 2.1 | 3.34 | 0.26 | 0.04  |
| Post-16 | 2.2             | 5.6 | 1.2 | 4.1 | 5.8  | 7.4 | 6.8 | 1.9 | 4.38 | 0.84 | 0.2   |
| Post-20 | 1.9             | 6.2 | 1.1 | 5.3 | 5.2  | 7.3 | 5.7 | 4.4 | 4.64 | 0.75 | 0.04  |
|         | <b>HIVgp140</b> |     |     |     |      |     |     |     |      |      |       |
| Pre-    | 0.3             | 2.7 | 3.4 | 4.1 | 2.2  | 1.5 | 2.1 | 0.6 | 2.11 | 0.71 |       |
| Post-4  | 3.2             | 1.6 | 2.9 | 5.5 | 4.3  | 7.1 | 3.9 | 0.9 | 3.68 | 0.46 | 0.1   |
| Post-8  | 4.2             | 8.8 | 3.1 | 6.5 | 10.7 |     | 8.3 | 4.3 | 6.55 | 1.07 | 0.001 |
| Post-16 | 3.5             | 7.4 | 3.6 | 6.4 | 9.1  | 7.4 | 4.5 | 2.8 | 5.59 | 0.81 | 0.004 |

**Table S7**Cytokine and Viral Load (VL) in CD4<sup>+</sup> T cells

|         |    | IL-12 |      | IL-6 |      | VL (AUC) |      |
|---------|----|-------|------|------|------|----------|------|
|         |    | %     | Net  | %    | Net  | %        | Net  |
| No. 301 | 0  | 6.2   |      | 13.5 |      | 11.7     |      |
|         |    |       | -5.1 |      | +2.9 |          | +0.8 |
|         | 20 | 1.1   |      | 10.6 |      | 12.5     |      |
|         |    |       |      |      |      |          |      |
| 303     | 0  | 8.4   |      | 11.5 |      | 10.5     |      |
|         |    |       | +1.0 |      | -1   |          | -0.7 |
|         | 20 | 9.4   |      | 10.5 |      | 9.8      |      |
|         |    |       |      |      |      |          |      |
| 304     | 0  | 2.3   |      | 13.4 |      | 4.7      |      |
|         |    |       | +3.2 |      | -4.4 |          | -3.1 |
|         | 20 | 5.5   |      | 9    |      | 1.6      |      |
|         |    |       |      |      |      |          |      |
| 305     | 0  | 2.6   |      | 20.9 |      | 8.5      |      |
|         |    |       | +5.1 |      | +8.7 |          | -6.9 |
|         | 20 | 7.7   |      | 29.6 |      | 1.0      |      |
|         |    |       |      |      |      |          |      |
| 310     | 0  | 3.1   |      | 8    |      | 8.8      |      |
|         |    |       | -0.3 |      | +7.8 |          | 0    |
|         | 20 | 2.8   |      | 15.8 |      | 8.8      |      |
|         |    |       |      |      |      |          |      |
| 313     | 0  | 3.3   |      | 13.2 |      | 12.4     |      |
|         |    |       | +2.4 |      | +6.5 |          | -3.4 |
|         | 20 | 5.7   |      | 19.7 |      | 9.0      |      |

|                                       |     |     |     |     |      |     |     |     |      |      |        |
|---------------------------------------|-----|-----|-----|-----|------|-----|-----|-----|------|------|--------|
| Post-20                               | 3.2 | 7.7 | 3   | 7.8 | 4.7  | 8.2 | 5.5 | 7.4 | 5.94 | 0.75 | 0.002  |
| <b>HSP70</b>                          |     |     |     |     |      |     |     |     |      |      |        |
| Pre-                                  | 1.4 | 3.7 | 2.3 | 3.6 | 2.1  | 1.9 | 2.8 | 4.2 | 2.75 | 0.35 |        |
| Post-4                                | 2   | 5.2 | 4.9 | 5   | 4.6  | 8.8 | 4   | 1.2 | 4.46 | 0.81 | 0.08   |
| Post-8                                | 4.3 | 3.8 | 5.3 | 5.5 | 10.5 |     | 6.5 | 3.3 | 5.6  | 0.91 | 0.004  |
| Post-16                               | 2.3 | 8.6 | 8.3 | 5.8 | 12.5 | 6.9 | 7.1 | 3   | 6.81 | 1.15 | 0.01   |
| Post-20                               | 3.8 | 7.1 | 6.3 | 7.9 | 6.5  | 6.1 | 6.8 | 2   | 5.81 | 0.59 | 0.007  |
| <b>(C) CD8+ T cells Proliferation</b> |     |     |     |     |      |     |     |     |      |      |        |
|                                       | 301 | 302 | 304 | 303 | 305  | 308 | 310 | 313 | mean | sem  | p      |
| <b>Medium</b>                         |     |     |     |     |      |     |     |     |      |      |        |
| Pre-                                  | 0.3 | 2.2 | 2.7 | 2.4 | 1.1  | 1.9 | 2   | 0.6 | 1.65 | 0.52 |        |
| Post-4                                | 1.9 | 1.3 | 2.3 | 4.5 | 4.6  | 2.6 | 2.7 | 0.3 | 2.53 | 0.31 | 0.24   |
| Post-8                                | 5   | 2.9 | 1.7 | 3.3 | 5    |     | 3.7 | 1.8 | 3.34 | 0.51 | 0.04   |
| Post-16                               | 4.8 | 5.2 | 2.5 | 3.2 | 3.3  | 3.1 | 3.9 | 5.2 | 3.9  | 0.37 | 0.0003 |
| Post-20                               | 5.2 | 1.8 | 1.6 | 5.3 | 1.7  | 3.1 | 3.7 | 3.8 | 3.28 | 0.53 | 0.08   |
| <b>HIVgp140</b>                       |     |     |     |     |      |     |     |     |      |      |        |
| Pre-                                  | 0.2 | 3.6 | 3.6 | 2.1 | 1.9  | 2.1 | 2.3 | 1   | 2.1  | 0.41 |        |
| Post-4                                | 3   | 1.7 | 3.8 | 5.2 | 6.6  | 4.1 | 4.3 | 1.1 | 3.73 | 0.63 | 0.065  |
| Post-8                                | 5.3 | 2.1 | 6.1 | 3.8 | 8.9  |     | 5.8 | 4.1 | 5.16 | 0.81 | 0.006  |
| Post-16                               | 4   | 7.8 | 7.3 | 4.5 | 6.1  | 5.9 | 5.3 | 3.9 | 5.6  | 0.51 | 0.0009 |
| Post-20                               | 4   | 6.3 | 6.3 | 6.3 | 6    | 4.9 | 6.4 | 8.7 | 6.11 | 0.48 | 0.0009 |
| <b>HSP70</b>                          |     |     |     |     |      |     |     |     |      |      |        |
| Pre-                                  | 0   | 3.2 | 3.8 | 1.8 | 2.1  | 2.5 | 2.3 | 5.1 | 2.6  | 0.53 |        |
| Post-4                                | 2.8 | 3.5 | 3.6 | 3.5 | 6    | 3.1 | 4.4 | 0.9 | 3.48 | 0.51 | 0.23   |
| Post-8                                | 4.9 | 1   | 3.9 | 6.2 | 10.5 |     | 4.5 | 7.6 | 5.51 | 1.1  | 0.04   |
| Post-16                               | 3.5 | 4.4 | 4.6 | 4.6 | 6.4  | 6.7 | 6.3 | 2.6 | 4.89 | 0.52 | 0.01   |
| Post-20                               | 5.6 | 3.5 | 5.2 | 5.3 | 3.6  | 4.8 | 7.8 | 5.7 | 5.19 | 0.48 | 0.003  |
